# Supplementary material for: Physical Exercise Promotes Recovery of Neurological Function after Ischemic Stroke in Rats
Source: PubMed Central journal article supplement (PMC4100192; doi:10.3390/ijms150610974), 2014-06-18
Supplement: ijms-15-10974-s001.pdf [file ijms-15-10974-s001.pdf]

## Supplementary Information

**Table S1.** Physiological alteration in tested rats.

| <b>Physiological Indicators</b> | <b>Sham</b> | <b>Control</b> | <b>Physical Exercise</b> |
|---------------------------------|-------------|----------------|--------------------------|
| MAP (mmHg)                      | 120 ± 12.3  | 122 ± 11.6     | 125 ± 12.0               |
| HR (f/min)                      | 419 ± 19    | 421 ± 23       | 427 ± 21                 |
| W (g)                           | 268 ± 11    | 265 ± 13       | 267 ± 14                 |
| T (°)                           | 37 ± 0.5    | 37 ± 0.5       | 37 ± 0.5                 |
| Glu (c/mmol·L <sup>-1</sup> )   | 8.41 ± 1.03 | 8.24 ± 1.21    | 8.38 ± 1.43              |

**Table S2.** Training distance.

| <b>Training Time</b> | <b>Sham</b> | <b>Control</b> | <b>Physical Exercise</b> |
|----------------------|-------------|----------------|--------------------------|
| Day 3                | quiescence  | quiescence     | run 120 m                |
| Day 7                | quiescence  | quiescence     | run 720 m                |
| Day 14               | quiescence  | quiescence     | run 2400 m               |

©2014 by the authors; licensee MDPI, Basel, Switzerland. This article is an open access article distributed under the terms and conditions of the Creative Commons Attribution license (<http://creativecommons.org/licenses/by/3.0/>).
